# Supplementary material for: MicroRNAs as diagnostic biomarkers of myasthenia gravis: a systematic review and meta-analysis
Source: Research Square preprint supplement (doi:10.21203/rs.3.rs-6221728/v1), 2025-03-27
Supplement: Supplementary file 3 [file b5e311fd5d2a796bc92da7d3.docx]

For PubMed:

("micrornas"[MeSH Terms] OR "microrna*"[Title/Abstract] OR "mirna*"[Title/Abstract] OR "micro RNA"[Title/Abstract] OR "micrornas"[Title/Abstract] OR "miRNAs"[Title/Abstract]) AND (("Biomarkers"[MeSH Terms] OR "biomarker*"[Title/Abstract] OR "biological marker*"[Title/Abstract] OR ("Diagnosis"[MeSH Terms] OR "diagnos*"[Title/Abstract] OR "diagnostic*"[Title/Abstract] OR "diagnosis*"[Title/Abstract]) OR "roc"[Title/Abstract]) AND ("Myasthenia Gravis"[MeSH Terms] OR "Myasthenia Gravis"[Title/Abstract]))

64

For Embase:

(('microRNA'/exp OR 'microRNA*':ti,ab OR 'miRNA*':ti,ab OR 'micro RNA':ti,ab OR 'microRNAs':ti,ab OR 'miRNAs':ti,ab)) AND ((('biomarker'/exp OR 'biomarker*':ti,ab OR 'biological marker*':ti,ab) OR ('diagnosis'/exp OR 'diagnos*':ti,ab OR 'diagnostic*':ti,ab OR 'diagnosis*':ti,ab) OR 'roc':ti,ab)) AND (('myasthenia gravis'/exp OR 'myasthenia gravis':ti,ab))

For Google Scholar:

("microRNA" OR "miRNA" OR "micro RNA" OR "microRNAs" OR "miRNAs") AND ("biomarker" OR "biological marker" OR "diagnosis" OR "diagnostic" OR "ROC") AND ("Myasthenia Gravis")
