# Supplementary material for: MicroRNAs as diagnostic biomarkers of myasthenia gravis: a systematic review and meta-analysis
Source: Research Square preprint supplement (doi:10.21203/rs.3.rs-6221728/v1), 2025-03-27
Supplement: Supplementary file 4 [file c66e37df4a507764a615bd1e.xlsx]

## Sheet: Sheet1
Author	Key domains
	Participant Selection	Index Test	Reference Standard	Flow and Timing
Punga et al. 2016	Risk: Low to Moderate. Small sample size and single-center study may introduce selection bias, though selection criteria were clearly defined.	Risk: Moderate. Circulating miRNAs were evaluated, but blinding of test interpretation was unclear.	Risk: Low. Diagnosis was confirmed using clinical criteria and standard MuSK antibody assay.	Risk: Moderate. All patients underwent the same reference test, but treatment status may have influenced biomarker levels.
Punga et al. 2014	Risk: Moderate. Only female patients with early-onset MG (AChR+) were included, which may limit generalizability. No immunosuppressive treatment was allowed.	Risk: Moderate. Circulating miRNA levels were analyzed using PCR-based methods, but blinding of test interpretation was not mentioned.	Risk: Low. MG diagnosis was confirmed by clinical criteria, AChR antibody testing, and neurophysiological assessments.	Risk: Moderate. Serum samples were collected before and after thymectomy, but variation in sample processing and potential confounders were not fully addressed.
Beretta et al. 2022	Risk: Moderate. Included 27 newly diagnosed MG patients, 245 healthy controls, and 20 OND patients, but subgroup distribution may affect generalizability.	Risk: Moderate. Serum miRNA levels were analyzed using qPCR, but blinding of test interpretation was not explicitly stated.	Risk: Low. MG diagnosis confirmed by clinical criteria, antibody testing, and electrophysiological assessments.	Risk: Moderate. Serum samples were collected within one year of diagnosis, but differences in collection protocols over time may introduce variability.
Bortone et al. 2020	Risk: Moderate. Included 27 MG patients and 10 controls, but restricted to early-onset AChR+ MG and thymectomy patients, limiting generalizability.	Risk: Moderate. miR-146a expression was analyzed in thymic tissue and blood using PCR-based methods, but blinding of test interpretation was not specified.	Risk: Low. MG diagnosis confirmed by clinical criteria, antibody testing, and neurophysiological assessment.	Risk: Moderate. Some patients received corticosteroids before sample collection, which could influence miRNA expression levels.
Lv et al. 2021	Risk: Moderate. Included 104 MG patients, 19 SLE patients, and 83 healthy controls, but cohort recruitment was regionally limited.	Risk: Moderate. Expression of hsa-circRNA5333-4 was analyzed using qPCR, but blinding of test interpretation was not mentioned.	Risk: Low. MG diagnosis was based on clinical criteria, antibody testing, and neurophysiological assessments by three specialists.	Risk: Moderate. Sample collection and processing varied across cohorts, and treatment history was not fully addressed.
Tan et al. 2021	Risk: Moderate. Included 11 MuSK-MG patients and 10 healthy controls, but small sample size and case-control design may limit generalizability.	Risk: Moderate. Differential miRNA expression was analyzed in PBMCs using NGS and RT-qPCR, but blinding of test interpretation was not mentioned.	Risk: Low. MG diagnosis confirmed using clinical criteria, MuSK antibody testing, and neurophysiological assessment.	Risk: Moderate. Sample collection and processing variations may introduce bias, and treatment history was not clearly addressed.
Cron et al. 2020	Risk: Moderate. Included 12 MG patients and 6 controls, but only early-onset AChR+ MG patients were studied, limiting generalizability.	Risk: Moderate. Expression of miR-29 family and DICER was analyzed in thymic samples using RT-PCR, but blinding of test interpretation was not mentioned.	Risk: Low. MG diagnosis confirmed using clinical criteria, AChR antibody testing, and thymic histology.	Risk: Moderate. Thymic samples were collected after thymectomy, and variations in sample handling could introduce bias.
