# Supplementary material for: MicroRNAs as diagnostic biomarkers of myasthenia gravis: a systematic review and meta-analysis
Source: Research Square preprint supplement (doi:10.21203/rs.3.rs-6221728/v1), 2025-03-27
Supplement: Supplementary file 5 [file edee0fb54c3d40953f0bf9bd.xlsx]

## Sheet: Sheet1
S.N	Author Year	miRNA studied	True positive (TP)	True negative (TN)	False Positive (FP)	Flase Negative (FN)
1	Punga et al. 2016	miR-151a-3p	13	16	4	7
		let-7a-5p	14	13	7	6
		let-7f-5p	18	11	9	2
		miR-423-5p	18	18	2	2
			0	0	0	0
			0	0	0	0
3	Punga et al. 2013	hsa-miR-150-5p	12	7	9	1
		hsa-miR-21-5p	12	8	8	1
			0	0	0	0
			0	0	0	0
5	Beretta et al. 2022	miR-30e-5p	17	253	42	14
		miR-150-5p	26	142	153	5
		miR-150-5p	9	172	123	1
			0	0	0	0
7	Bortone et al. 2020	miR-146a	25	8	3	6
			0	0	0	0
			0	0	0	0
			0	0	0	0
10	Lv et al. 2021	has-circ-0076490	15	12	7	4
		hsa-circRNA5333-4	16	14	5	3
		has-circ-0047056	10	16	3	9
		hsa-circRNA16293-1	16	12	7	3
			0	0	0	0
			0	0	0	0
14	Xu et al. 2019	miR-106a-5p		29
		miR-106a-5p	43	34	15	9
			0	0	0	0
15	Mu et al. 2024	miR-130a-3p	8	7	3	2
		miR-320d	8	8	2	2
		miR-3614-3p	8	8	2	2
		miR-6752-5p	8	8	2	2
		miR-4712-3p	8	8	2	2
			0	0	0	0
			0	0	0	0
			0	0	0	0
18	Tan et al. 2021	miR-340-5p	9	9	1	2
		miR-106b-5p	9	8	2	2
		miR-27a-3p	11	7	3	0
		miR-15a-3p	11	9	1	0
		Combined above four	0	0	0	0
			0	0	0	0
19	Cron et al. 2020	miR-29a-3p	11	5	1	1
		miR-29b-3p	10	5	1	2
		miR-29c-5p	10	5	1	2
			0	0	0	0
			0	0	0	0
					0
